# Supplementary material
Source: Springer Nature journal article supplement (https://www.springermedizin.de/resource/supplementary/12985_2014_2476_MOESM1_ESM.pdf/9606820)

A

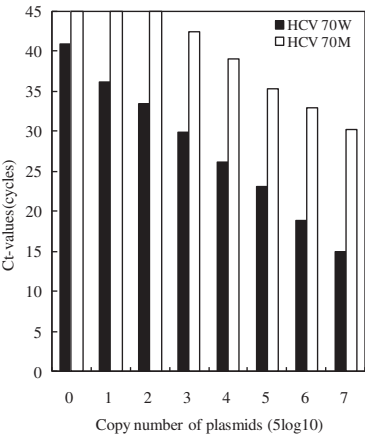

B

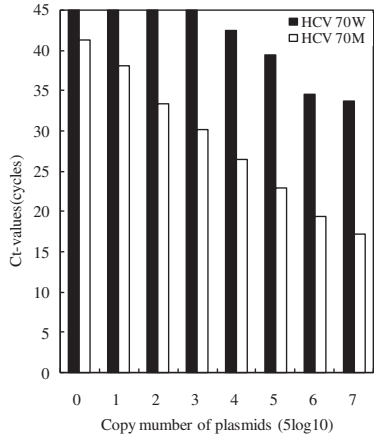

Supplement: MOESM1 [file 9606820]
